# Supplementary material
Source: HighWire-hosted journal article supplement (http://ajnr-stage2.highwire.org/highwire/filestream/182374/field_highwire_adjunct_files/0/17-00011.pdf)
Supplement: 17-00011.pdf [file 17-00011.pdf]

**On-line Table 1: Subgroup analysis of cardiac embolism occlusion before and after matching<sup>a</sup>**

|                                                                | Before Matching |                 |       | After Matching   |                  |       |
|----------------------------------------------------------------|-----------------|-----------------|-------|------------------|------------------|-------|
|                                                                | ST 6 (n = 146)  | ST 4 (n = 177)  | P     | ST 6 (n = 93)    | ST 4 (n = 93)    | P     |
| Baseline characteristics                                       |                 |                 |       |                  |                  |       |
| Age (median) (IQR) (yr)                                        | 71 (61–77)      | 67 (59–75)      | .053  | 69 (58–75)       | 67 (60–76)       | .348  |
| Women (No.) (%)                                                | 80 (54.8%)      | 95 (53.7%)      | .84   | 45 (48.4%)       | 53 (57%)         | .291  |
| Hypertension (No.) (%)                                         | 85 (58.2%)      | 107 (60.5%)     | .684  | 57 (61.3%)       | 62 (66.7%)       | .458  |
| Diabetes mellitus (No.) (%)                                    | 23 (15.8%)      | 35 (19.8%)      | .349  | 16 (17.2%)       | 21 (22.6%)       | .486  |
| Current smoker (No.) (%)                                       | 31 (21.2%)      | 32 (18.1%)      | .477  | 24 (25.8%)       | 15 (16.1%)       | .151  |
| SBP (median) (IQR) (mm Hg)                                     | 145 (125–160)   | 141 (128–160)   | .791  | 144 (27)         | 146 (26)         | .769  |
| GLU (median) (IQR) (mmol/L)                                    | 7 (6.13–8.9)    | 6.7 (5.82–8.62) | .117  | 6.83 (6.08–9.10) | 6.73 (5.83–8.62) | .534  |
| ASPECTS (median) (IQR)                                         | 9 (7–10)        | 9 (8–10)        | .101  | 9 (8–10)         | 9 (7–10)         | .620  |
| NIHSS (median) (IQR)                                           | 18 (14–23)      | 17 (13–21)      | .267  | 16 (13–21)       | 18 (14–22)       | .598  |
| IV (No.) (%)                                                   | 49 (33.6%)      | 55 (31.1%)      | .634  | 30 (32.3%)       | 33 (35.5%)       | .749  |
| Workflow times                                                 |                 |                 |       |                  |                  |       |
| Onset to visit (median) (IQR) (min)                            | 120 (60–220)    | 117 (52–208)    | .448  | 98 (40–185)      | 80 (39–194)      | .602  |
| Onset to treatment (median) (IQR) (min)                        | 242 (186–341)   | 250 (195–328)   | .697  | 230 (182–310)    | 240 (189–308)    | 1.000 |
| Artery occlusion site                                          |                 |                 |       |                  |                  |       |
| ICA (No.) (%)                                                  | 86 (58.9%)      | 46 (26%)        | <.001 | 43 (46.2%)       | 37 (39.8%)       | .146  |
| MCA (No.) (%)                                                  | 60 (41.1%)      | 131 (74%)       | <.001 | 50 (53.8%)       | 56 (60.2%)       | .146  |
| Collateral flow grade (ASITN/SIR)                              |                 |                 | <.001 |                  |                  | .607  |
| 0–1 (No.) (%)                                                  | 103 (71%)       | 82 (46.6%)      |       | 57 (61.3%)       | 60 (64.5%)       |       |
| 2–3 (No.) (%)                                                  | 42 (29%)        | 94 (53.4%)      |       | 36 (38.7%)       | 33 (35.5%)       |       |
| Clinical outcomes                                              |                 |                 |       |                  |                  |       |
| mTICI                                                          |                 |                 | .171  |                  |                  | .678  |
| 0–2a (No.) (%)                                                 | 28 (19.2%)      | 24 (13.6%)      |       | 16 (17.2%)       | 13 (14%)         |       |
| 2b–3 (No.) (%)                                                 | 118 (80.8%)     | 153 (86.4%)     |       | 77 (82.8%)       | 80 (86%)         |       |
| Workflow times                                                 |                 |                 |       |                  |                  |       |
| Time from puncture to revascularization (median) (IQR) (min)   | 100 (72–135)    | 92 (68–133)     | .202  | 104 (70–133)     | 100 (71–157)     | .836  |
| Time from stent deployment to reperfusion (median) (IQR) (min) | 57 (30–83)      | 43 (20–73)      | .015  | 58 (30–83)       | 47 (23–100)      | 1.000 |
| Passes of thrombectomy                                         |                 |                 |       |                  |                  |       |
| Median (IQR)                                                   | 2 (2–3)         | 2 (1–3)         | .082  | 2 (1–3)          | 2 (1–3)          | 1.000 |
| ≤2 (No.) (%)                                                   | 82 (56.2%)      | 115 (65%)       | .106  | 55 (59.1%)       | 62 (66.7%)       | 0.324 |
| ≤3 (No.) (%)                                                   | 121 (82.9%)     | 149 (84.2%)     | .753  | 81 (87.1%)       | 76 (81.7%)       | .405  |
| Rescue therapy (No.) (%)                                       | 59 (40.4%)      | 71 (40.1%)      | .957  | 40 (43%)         | 38 (40.9%)       | .877  |
| Complications                                                  |                 |                 |       |                  |                  |       |
| Arterial perforation (No.) (%)                                 | 2 (1.4%)        | 1 (0.6%)        | .591  | 2 (2.2%)         | 0                | .500  |
| Vessel dissection (No.) (%)                                    | 2 (1.4%)        | 4 (2.3%)        | .693  | 1 (1.1%)         | 2 (2.2%)         | .625  |
| Stent fracture (No.) (%)                                       | 1 (0.7%)        | 0               | .270  | 1 (1.1%)         | 0                | 1.000 |
| Isolated SAH (No.) (%)                                         | 4 (2.7%)        | 3 (1.7%)        | .705  | 2 (2.2%)         | 1 (1.1%)         | 1.000 |
| Symptomatic ICH (No.) (%)                                      | 28 (19.2%)      | 38 (21.5%)      | .611  | 14 (15.1%)       | 21 (22.6%)       | .23   |
| Asymptomatic ICH (No.) (%)                                     | 57 (39%)        | 58 (32.8%)      | .241  | 36 (38.7%)       | 30 (32.3%)       | .44   |
| mRS 90 days                                                    |                 |                 | .083  |                  |                  | .499  |
| 0–2 (No.) (%)                                                  | 45 (30.8%)      | 71 (40.1%)      |       | 32 (34.4%)       | 37 (39.8%)       |       |
| 3–6 (No.) (%)                                                  | 101 (69.2%)     | 106 (59.9%)     |       | 61 (65.6%)       | 56 (60.2%)       |       |
| In-hospital mortality (No.) (%)                                | 52 (35.6%)      | 44 (24.9%)      | .035  | 23 (24.7%)       | 27 (29%)         | .617  |

**Note:**—ASITN/SIR indicates American Society of Interventional and Therapeutic Neuroradiology, Society of Interventional Radiology; GLU, glucose; SBP, systolic blood pressure; ICH, intracerebral hemorrhage.

<sup>a</sup>The logistic regression model used for the determination of the propensity score included the following factors: age, sex, time from onset to groin puncture, NIHSS score, ASPECTS, site of vessel occlusion, and collateral blood flow.

**On-line Table 2: Subgroup analysis of ICA occlusion before and after matching<sup>a</sup>**

|                                                              | Before Matching |                  |       | After Matching   |                  |       |
|--------------------------------------------------------------|-----------------|------------------|-------|------------------|------------------|-------|
|                                                              | ST 6 (n = 155)  | ST 4 (n = 86)    | P     | ST 6 (n = 74)    | ST 4 (n = 74)    | P     |
| Baseline characteristics                                     |                 |                  |       |                  |                  |       |
| Age (median) (IQR) (yr)                                      | 68 (60–75)      | 65 (55–74)       | .166  | 66 (56–73)       | 67 (57–76)       | .403  |
| Women (No.) (%)                                              | 70 (45.2%)      | 36 (41.9%)       | .621  | 32 (43.2%)       | 33 (44.6%)       | 1.000 |
| AF (No.) (%)                                                 | 80 (51.6%)      | 39 (45.3%)       | .351  | 41 (55.4%)       | 33 (44.6%)       | .291  |
| Hypertension (No.) (%)                                       | 92 (59.4%)      | 50 (58.1%)       | .854  | 48 (64.9%)       | 44 (59.5%)       | .596  |
| Diabetes mellitus (No.) (%)                                  | 27 (17.4%)      | 14 (16.3%)       | .821  | 12 (16.2%)       | 13 (17.6%)       | 1.000 |
| Current smoker (No.) (%)                                     | 35 (22.6%)      | 21 (24.4%)       | .746  | 16 (21.6%)       | 19 (25.7%)       | .678  |
| SBP (median) (IQR) (mm Hg)                                   | 143 (130–160)   | 147 (130–160)    | .822  | 143 (130–165)    | 147 (130–160)    | .906  |
| GLU (median) (IQR) (mmol/L)                                  | 7 (5.9–8.86)    | 6.81 (5.71–8.70) | .214  | 6.64 (5.60–8.75) | 6.86 (5.76–8.82) | .727  |
| ASPECTS (median) (IQR)                                       | 9 (7–10)        | 10 (8–10)        | .001  | 9 (8–10)         | 10 (8–10)        | .755  |
| NIHSS (median) (IQR)                                         | 17 (13–21)      | 18 (14–21)       | .306  | 17 (13–21)       | 18 (14–21)       | .275  |
| IV (No.) (%)                                                 | 49 (31.6%)      | 26 (30.2%)       | .825  | 28 (37.8%)       | 22 (29.7%)       | .361  |
| Workflow times                                               |                 |                  |       |                  |                  |       |
| Onset to visit (median) (IQR) (min)                          | 125 (83–224)    | 115 (50–206)     | .033  | 120 (65–195)     | 120 (50–210)     | .907  |
| Onset to treatment (median) (IQR) (min)                      | 281 (213–350)   | 247 (189–326)    | .034  | 240 (201–314)    | 243 (185–331)    | .815  |
| Stroke subtype                                               |                 |                  |       |                  |                  |       |
| Atherosclerotic (No.) (%)                                    | 55 (35.5%)      | 33 (38.4%)       | .655  | 27 (36.5%)       | 28 (37.8%)       | 1.000 |
| Cardiac embolism (No.) (%)                                   | 86 (55.5%)      | 46 (53.5%)       | .766  | 41 (55.4%)       | 40 (54.1%)       | 1.000 |
| Other undetermined etiology (No.) (%)                        | 14 (9%)         | 7 (8.1%)         | .814  | 6 (8.1%)         | 6 (8.1%)         | 1.000 |
| Collateral flow grade (ASITN/SIR)                            |                 |                  | .882  |                  |                  | .864  |
| 0–1 (No.) (%)                                                | 97 (63%)        | 55 (64%)         |       | 49 (66.2%)       | 47 (63.5%)       |       |
| 2–3 (No.) (%)                                                | 57 (37%)        | 31 (36%)         |       | 25 (33.8%)       | 27 (36.5%)       |       |
| Clinical outcomes                                            |                 |                  |       |                  |                  |       |
| mTICI                                                        |                 |                  | .826  |                  |                  | 1.000 |
| 0–2a (No.) (%)                                               | 38 (24.5%)      | 20 (23.3%)       |       | 16 (21.6%)       | 17 (23%)         |       |
| 2b–3 (No.) (%)                                               | 117 (75.5%)     | 66 (76.7%)       |       | 58 (78.4%)       | 57 (77%)         |       |
| Workflow times                                               |                 |                  |       |                  |                  |       |
| Time from puncture to revascularization (median) (IQR) (min) | 120 (88–165)    | 110 (82–166)     | .556  | 120 (92–166)     | 117 (83–170)     | .561  |
| Time from stent deploy to reperfusion (median) (IQR) (min)   | 67 (38–102)     | 47 (26–100)      | .046  | 75 (43–109)      | 50 (27–106)      | .483  |
| Passes of thrombectomy                                       |                 |                  |       |                  |                  |       |
| Median (IQR)                                                 | 2 (2–3)         | 2 (1–3)          | .164  | 2.5 (2–3)        | 2 (1–3)          | .156  |
| ≤2 (No.) (%)                                                 | 83 (53.5%)      | 52 (60.5%)       | .301  | 37 (50%)         | 46 (62.2%)       | .200  |
| ≤3 (No.) (%)                                                 | 117 (75.5%)     | 66 (76.7%)       | .827  | 58 (78.4%)       | 57 (77%)         | 1.000 |
| Rescue therapy (No.) (%)                                     | 77 (49.7%)      | 53 (61.6%)       | .075  | 36 (48.6%)       | 44 (59.5%)       | .216  |
| Complications                                                |                 |                  |       |                  |                  |       |
| Arterial perforation (No.) (%)                               | 1 (0.6%)        | 1 (1.2%)         | 1.000 | 1 (1.4%)         | 1 (1.4%)         | 1.000 |
| Vessel dissection (No.) (%)                                  | 3 (1.9%)        | 6 (7.0%)         | .073  | 2 (2.7%)         | 5 (6.8%)         | .180  |
| Stent failure to deploy (No.) (%)                            | 1 (0.6%)        | 0                | 1.000 | 1 (1.4%)         | 0                | 1.000 |
| Stent fracture (No.) (%)                                     | 1 (0.6%)        | 0                | 1.000 | 1 (1.4%)         | 0                | 1.000 |
| Isolated SAH (No.) (%)                                       | 3 (1.9%)        | 0                | .555  | 3 (4.1%)         | 0                | .250  |
| Symptomatic ICH (No.) (%)                                    | 31 (20%)        | 14 (16.3%)       | .478  | 15 (20.3%)       | 10 (13.5%)       | .332  |
| Asymptomatic ICH (No.) (%)                                   | 60 (38.7%)      | 41 (47.7%)       | .177  | 33 (44.6%)       | 37 (50%)         | .617  |
| mRS 90 days                                                  |                 |                  | .204  |                  |                  | 1.000 |
| 0–2 (No.) (%)                                                | 47 (30.3%)      | 33 (38.4%)       |       | 27 (36.5%)       | 28 (37.8%)       |       |
| 3–6 (No.) (%)                                                | 108 (69.7%)     | 53 (61.6%)       |       | 47 (63.5%)       | 46 (62.2%)       |       |
| In-hospital mortality (No.) (%)                              | 54 (34.8%)      | 25 (29.1%)       | .361  | 23 (31.1%)       | 22 (29.7%)       | 1.000 |

**Note:**—ASITN/SIR indicates American Society of Interventional and Therapeutic Neuroradiology, Society of Interventional Radiology; GLU, glucose; SBP, systolic blood pressure; AF, atrial fibrillation; ICH, intracerebral hemorrhage.

<sup>a</sup> The logistic regression model used for the determination of the propensity score included the following factors: age, time from onset symptom to visit, time from onset to groin puncture, ASPECTS, subtype of stroke, and collateral blood flow.

**On-line Table 3: Subgroup analysis of MCA occlusion before and after matching<sup>a</sup>**

|                                                                | Before Matching  |                  |       | After Matching    |                  |       |
|----------------------------------------------------------------|------------------|------------------|-------|-------------------|------------------|-------|
|                                                                | ST 6 (n = 100)   | ST 4 (n = 284)   | P     | ST 6 (n = 88)     | ST 4 (n = 88)    | P     |
| Baseline characteristics                                       |                  |                  |       |                   |                  |       |
| Age (median) (IQR) (yr)                                        | 68 (56–75)       | 64 (53–73)       | .046  | 68 (56–75)        | 66 (53–75)       | .51   |
| Women (No.) (%)                                                | 42 (42%)         | 113 (39.8%)      | .698  | 37 (42%)          | 32 (36.4%)       | .551  |
| AF (No.) (%)                                                   | 51 (51%)         | 99 (35%)         | .005  | 43 (48.9%)        | 39 (44.3%)       | .556  |
| Hypertension (No.) (%)                                         | 65 (65%)         | 179 (63%)        | .725  | 57 (64.8%)        | 59 (67%)         | .88   |
| Diabetes mellitus (No.) (%)                                    | 18 (18%)         | 52 (18.3%)       | .005  | 17 (19.3%)        | 17 (19.3%)       | 1.000 |
| Current smoker (No.) (%)                                       | 33 (33%)         | 71 (25%)         | .122  | 29 (33%)          | 23 (26.1%)       | .44   |
| SBP (median) (IQR) (mm Hg)                                     | 150 (126–162)    | 143 (128–160)    | .313  | 154 (123–165)     | 140 (123–155)    | .106  |
| GLU (median) (IQR) (mmol/L)                                    | 6.46 (5.47–9.65) | 6.62 (5.77–8.30) | .821  | 6.46 (5.41–10.06) | 6.49 (5.66–8.19) | .456  |
| ASPECTS (median) (IQR)                                         | 9 (8–10)         | 9 (8–10)         | .339  | 9 (7–10)          | 9 (7–10)         | .45   |
| NIHSS (median) (IQR)                                           | 17 (14–21)       | 16 (11–20)       | .008  | 17 (13–21)        | 16 (12–21)       | .326  |
| IV (No.) (%)                                                   | 32 (32%)         | 93 (32.7%)       | .891  | 29 (33%)          | 35 (39.8%)       | .47   |
| Workflow times                                                 |                  |                  |       |                   |                  |       |
| Onset to visit (median) (IQR) (min)                            | 148 (62–240)     | 122 (60–230)     | .339  | 148 (62–237)      | 141 (60–244)     | .166  |
| Onset to treatment (median) (IQR) (min)                        | 267 (192–358)    | 280 (209–356)    | .638  | 101 (70–128)      | 93 (66–130)      | .83   |
| Stroke subtype                                                 |                  |                  |       |                   |                  |       |
| Atherosclerotic (No.) (%)                                      | 39 (39%)         | 136 (47.9%)      | .125  | 34 (38.6%)        | 40 (45.5%)       | .391  |
| Cardiac embolism (No.) (%)                                     | 60 (60%)         | 131 (46.1%)      | .017  | 53 (60.2%)        | 46 (52.3%)       | .296  |
| Other undetermined etiology (No.) (%)                          | 1 (1%)           | 17 (6%)          | .043  | 1 (1.1%)          | 2 (2.3%)         | 1.000 |
| Collateral flow grade (ASITN/SIR)                              |                  |                  | <.001 |                   |                  | .070  |
| 0–1 (No.) (%)                                                  | 59 (59%)         | 100 (35.5%)      |       | 48 (54.5%)        | 42 (47.7%)       |       |
| 2–3 (No.) (%)                                                  | 41 (41%)         | 182 (64.5%)      |       | 40 (45.5%)        | 46 (52.3%)       |       |
| Clinical outcomes                                              |                  |                  |       |                   |                  |       |
| mTICI                                                          |                  |                  | .325  |                   |                  | .424  |
| 0–2a (No.) (%)                                                 | 13 (13%)         | 27 (9.5%)        |       | 10 (11.4%)        | 6 (6.8%)         |       |
| 2b–3 (No.) (%)                                                 | 87 (87%)         | 257 (90.5%)      |       | 78 (88.6%)        | 82 (93.2%)       |       |
| Workflow times                                                 |                  |                  |       |                   |                  |       |
| Time from puncture to revascularization (median) (IQR) (min)   | 101 (68–128)     | 93 (68–130)      | .617  | 101 (70–128)      | 93 (66–130)      | .594  |
| Time from stent deployment to reperfusion (median) (IQR) (min) | 47 (26.5–83)     | 43 (20–71)       | .241  | 47 (26–76)        | 47 (19–69)       | .456  |
| Passes of thrombectomy                                         |                  |                  |       |                   |                  |       |
| Median (IQR)                                                   | 2 (1–3)          | 2 (1–2)          | .816  | 2 (1–3)           | 2 (1–2)          | .699  |
| ≤2 (No.) (%)                                                   | 72 (72%)         | 220 (77.5%)      | .271  | 65 (73.9%)        | 71 (80.7%)       | .391  |
| ≤3 (No.) (%)                                                   | 93 (93%)         | 256 (90.1%)      | .394  | 82 (93.2%)        | 82 (93.2%)       | 1.000 |
| Rescue therapy (No.) (%)                                       | 56 (56%)         | 129 (45.4%)      | .069  | 48 (54.5%)        | 38 (43.2%)       | .194  |
| Complications                                                  |                  |                  |       |                   |                  |       |
| Arterial perforation (No.) (%)                                 | 1 (1%)           | 5 (1.8%)         | 1.000 | 1 (1.1%)          | 0                | 1.000 |
| Vessel dissection (No.) (%)                                    | 0                | 0                | NA    | 0                 | 0                | NA    |
| Isolated SAH (No.) (%)                                         | 1 (1%)           | 9 (3.2%)         | .464  | 1 (1.1%)          | 1 (1.1%)         | 1.000 |
| Symptomatic ICH (No.) (%)                                      | 10 (10%)         | 46 (16.2%)       | .131  | 7 (8%)            | 14 (15.9%)       | .143  |
| Asymptomatic ICH (No.) (%)                                     | 32 (32%)         | 77 (27.1%)       | .351  | 28 (31.8%)        | 21 (23.9%)       | .36   |
| mRS 90 days                                                    |                  |                  | .171  |                   |                  | .188  |
| 0–2 (No.) (%)                                                  | 41 (41%)         | 139 (48.9%)      |       | 36 (40.9%)        | 45 (51.1%)       |       |
| 3–6 (No.) (%)                                                  | 59 (59%)         | 145 (51.1%)      |       | 52 (59.1%)        | 43 (48.9%)       |       |
| In-hospital mortality (No.) (%)                                | 20 (20%)         | 52 (18.3%)       | .710  | 16 (18.2%)        | 19 (21.6%)       | .664  |

**Note:**—NA indicates not applicable; ASITN/SIR, American Society of Interventional and Therapeutic Neuroradiology, Society of Interventional Radiology; GLU, glucose; SBP, systolic blood pressure; AF, atrial fibrillation.

<sup>a</sup> The logistic regression model used for the determination of the propensity score included the following factors: age, sex, atrial fibrillation, hypertension, subtype of stroke, time from onset to groin puncture, ASPECTS, and collateral blood flow.

**On-line Table 4: Logistic regression model of favorable reperfusion in patients with atherosclerosis-related occlusion after matching<sup>a</sup>**

| Variables             | Odds Ratio | 95% CI        | P    |
|-----------------------|------------|---------------|------|
| ST 4 device (vs ST 6) | 3.217      | 1.129–9.162   | .029 |
| Propensity score      | 52.84      | 3.468–805.018 | .004 |

<sup>a</sup> Propensity score included variables as follows: age, time from onset symptom to visit, time from onset to groin puncture, NIHSS score, ASPECTS, site of vessel occlusion, and collateral blood flow. Logistic regression including the propensity score as a covariate used stepwise logistic regressions model, with entry and removal limits set at 0.05 and 0.10 separately.

**On-line Table 5: Distribution of mTICI in patients with atherosclerosis-related occlusion after propensity score matching analysis**

| mTICI (No.) (%) | ST 6 (n = 66) | ST 4 (n = 66) |
|-----------------|---------------|---------------|
| 0               | 8 (12.1%)     | 1 (1.5%)      |
| 1               | 1 (1.5%)      | 3 (4.5%)      |
| 2a              | 7 (10.6%)     | 2 (3.0%)      |
| 2b              | 23 (34.8%)    | 23 (34.8%)    |
| 3               | 27 (40.9%)    | 37 (56.1%)    |
